# Supplementary material
Source: MDPI journal article supplement (https://www.mdpi.com/2072-4292/15/22/5431)
Supplement: s1 [file s1]

**Table S1.** Parameter settings used in the RTM in the simulation.

| Parameters                                                                               |                                                                                                                                                                                                                                                                                                                                                                                                                                                                                                                                                                                                                                                                                                                                                                                                                     |
|------------------------------------------------------------------------------------------|---------------------------------------------------------------------------------------------------------------------------------------------------------------------------------------------------------------------------------------------------------------------------------------------------------------------------------------------------------------------------------------------------------------------------------------------------------------------------------------------------------------------------------------------------------------------------------------------------------------------------------------------------------------------------------------------------------------------------------------------------------------------------------------------------------------------|
| Type of radiative transfer model                                                         | scattered light in a spherical atmosphere                                                                                                                                                                                                                                                                                                                                                                                                                                                                                                                                                                                                                                                                                                                                                                           |
| Target species                                                                           | aerosol, NO <sub>2</sub>                                                                                                                                                                                                                                                                                                                                                                                                                                                                                                                                                                                                                                                                                                                                                                                            |
| Wavelength (nm)                                                                          | 360                                                                                                                                                                                                                                                                                                                                                                                                                                                                                                                                                                                                                                                                                                                                                                                                                 |
| Single scattering albedo (SSA)                                                           | 0.9                                                                                                                                                                                                                                                                                                                                                                                                                                                                                                                                                                                                                                                                                                                                                                                                                 |
| Asymmetry parameter (AP)                                                                 | 0.72                                                                                                                                                                                                                                                                                                                                                                                                                                                                                                                                                                                                                                                                                                                                                                                                                |
| Surface albedo                                                                           | 0.06                                                                                                                                                                                                                                                                                                                                                                                                                                                                                                                                                                                                                                                                                                                                                                                                                |
| Solar zenith angle (SZA, °)                                                              | 60                                                                                                                                                                                                                                                                                                                                                                                                                                                                                                                                                                                                                                                                                                                                                                                                                  |
| Relative azimuth angle (RAA, °)                                                          | 120                                                                                                                                                                                                                                                                                                                                                                                                                                                                                                                                                                                                                                                                                                                                                                                                                 |
| Elevation angles (EA, °)                                                                 | Setting I (10 EAs): 1, 2, 3, 4, 5, 6, 8, 15, 30, 90<br>Setting II (6 EAs): 2, 4, 8, 15, 30, 90<br>Setting III (6 EAs): 1, 2, 3, 4, 5, 90<br>Setting IV (6 EAs): 5, 6, 8, 15, 30, 90                                                                                                                                                                                                                                                                                                                                                                                                                                                                                                                                                                                                                                 |
| Aerosol optical depth (AOD)                                                              | 0.3                                                                                                                                                                                                                                                                                                                                                                                                                                                                                                                                                                                                                                                                                                                                                                                                                 |
| NO <sub>2</sub> Vertical column density (VCD, 10 <sup>16</sup> molec. cm <sup>-2</sup> ) | 1.0                                                                                                                                                                                                                                                                                                                                                                                                                                                                                                                                                                                                                                                                                                                                                                                                                 |
| Profile types and parameters                                                             | <p>Exponential: <math>f_E(z) = A_E(h_E) \times \exp(\frac{-z}{h_E})</math> with scale height <math>h_E</math> of 0.5 km;</p> <p>Gaussian: <math>f_G(z) = A_G(h_G, \sigma) \times \exp(\frac{-(z-h_G)^2}{2\sigma^2})</math> with peak height <math>h_G</math> of 1.0 km, and the full width at half maximum (FWHM) <math>\sigma</math> of 0.5 km;</p> <p>Boltzmann: <math>f_B(z) = \frac{A_B(h_B)}{1 + \exp(\frac{-(z-h_B)}{0.3})}</math> with the effective profile height <math>h_B</math> of 1.5 km.</p> <p>The <math>z</math> is the altitude. The normalization factors <math>A_E</math>, <math>A_B</math>, and <math>A_G</math> were determined by numerical integration from 0 to 4 km altitude such that the integrals of <math>f_E</math>, <math>f_G</math>, and <math>f_B</math> were equal to 1. [22]</p> |
| Pressure and temperature profiles                                                        | U.S. Standard Atmosphere (NASA, 1976) [44]                                                                                                                                                                                                                                                                                                                                                                                                                                                                                                                                                                                                                                                                                                                                                                          |
| Vertical resolution of the input profile (m)                                             | 100, 200                                                                                                                                                                                                                                                                                                                                                                                                                                                                                                                                                                                                                                                                                                                                                                                                            |
